# Supplementary material
Source: Springer Nature journal article supplement (https://www.springermedizin.de/resource/supplementary/13052_2013_362_MOESM1_ESM.pdf/9671966)

# Phenotype

■ Pathogenic CNV carriers  
□ negative/benign CNV carriers

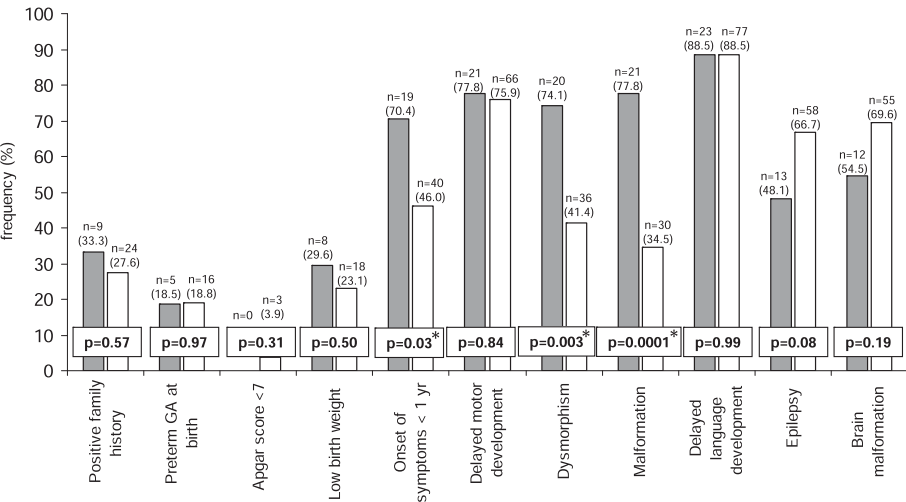

Supplement: MOESM1 [file 9671966]
